# Supplementary material
Source: PubMed Central journal article supplement (PMC8284982)

## SUPPLEMENTAL MATERIAL

**Supplemental Figure:** Calibration plot on the test dataset depicting performance of the various models employed (random forest, LASSO, CNN, Ensemble method, and CHA<sub>2</sub>DS<sub>2</sub>-VASc)

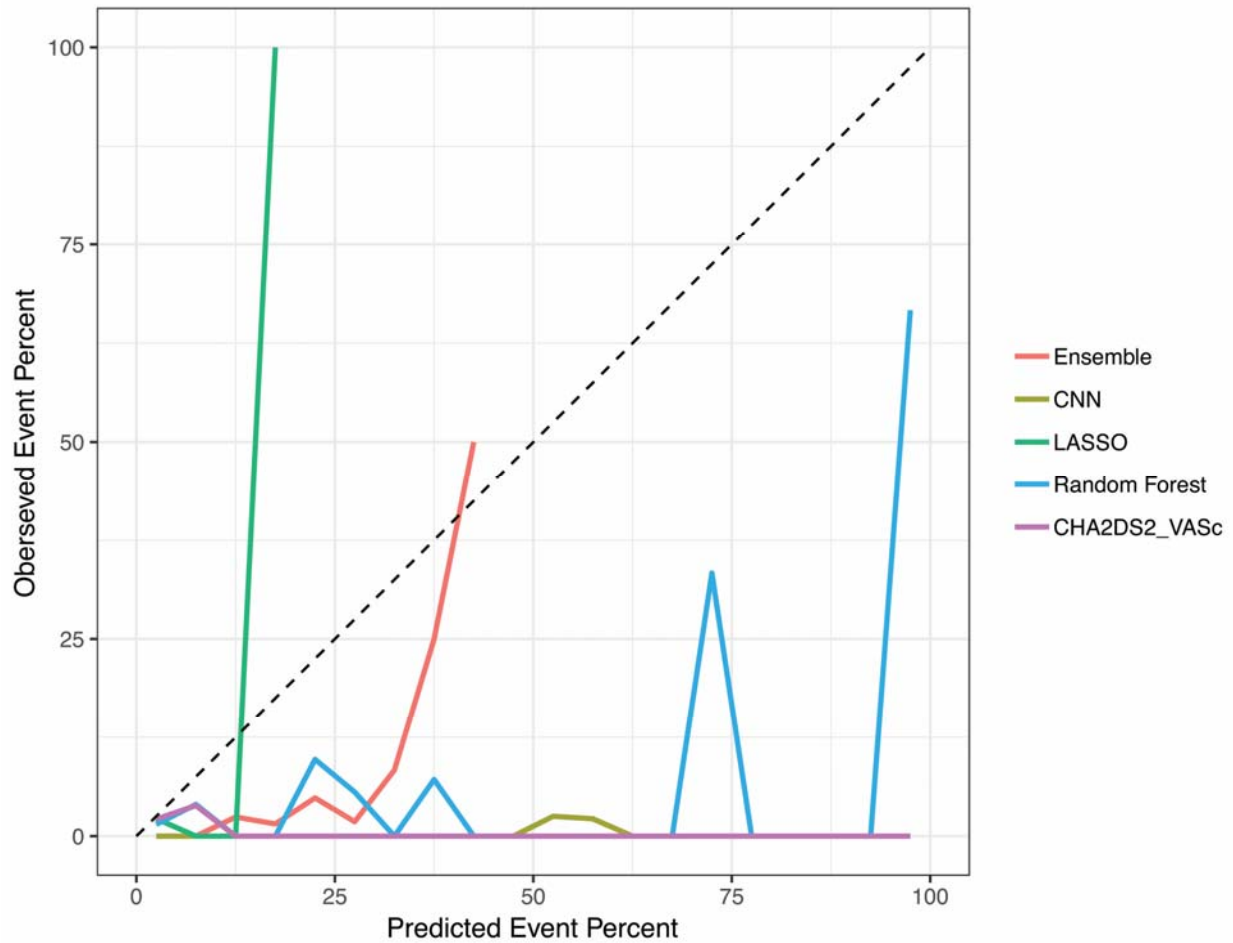

Supplement: NIHMS1540228-supplement-Supplemental_Material.pdf [file NIHMS1540228-supplement-Supplemental_Material.pdf]
